# Supplementary material for: An electronically conductive 3D architecture with controlled porosity for LiFePO4 cathodes
Source: Frontiers journal article supplement (doi:10.3389/fmats.2023.1213872), 2023-11-27
Supplement: Data_Sheet_1.docx [file Data_Sheet_1.docx]

Supplementary Information

An Electronically Conductive 3D Architecture with Controlled Porosity for LiFePO4 Cathodes

Martin Nguyen1, Zhiming Liang1, Kaitlin Garman1, Yangyang Wang1, Adrian Gestos1, Michael Mo2, Chunmei Ban1, 3*

1Paul M Rady Department of Mechanical Engineering, University of Colorado Boulder, Boulder, CO, USA

2KULR Technology Group, Inc, San Diego, CA, USA

3Materials Science and Engineering Program, College of Applied Sciences and Engineering University of Colorado Boulder, Boulder, CO, USA

*** Correspondence:**Chunmei Ban*
Chunmei.Ban@colorado.edu

**
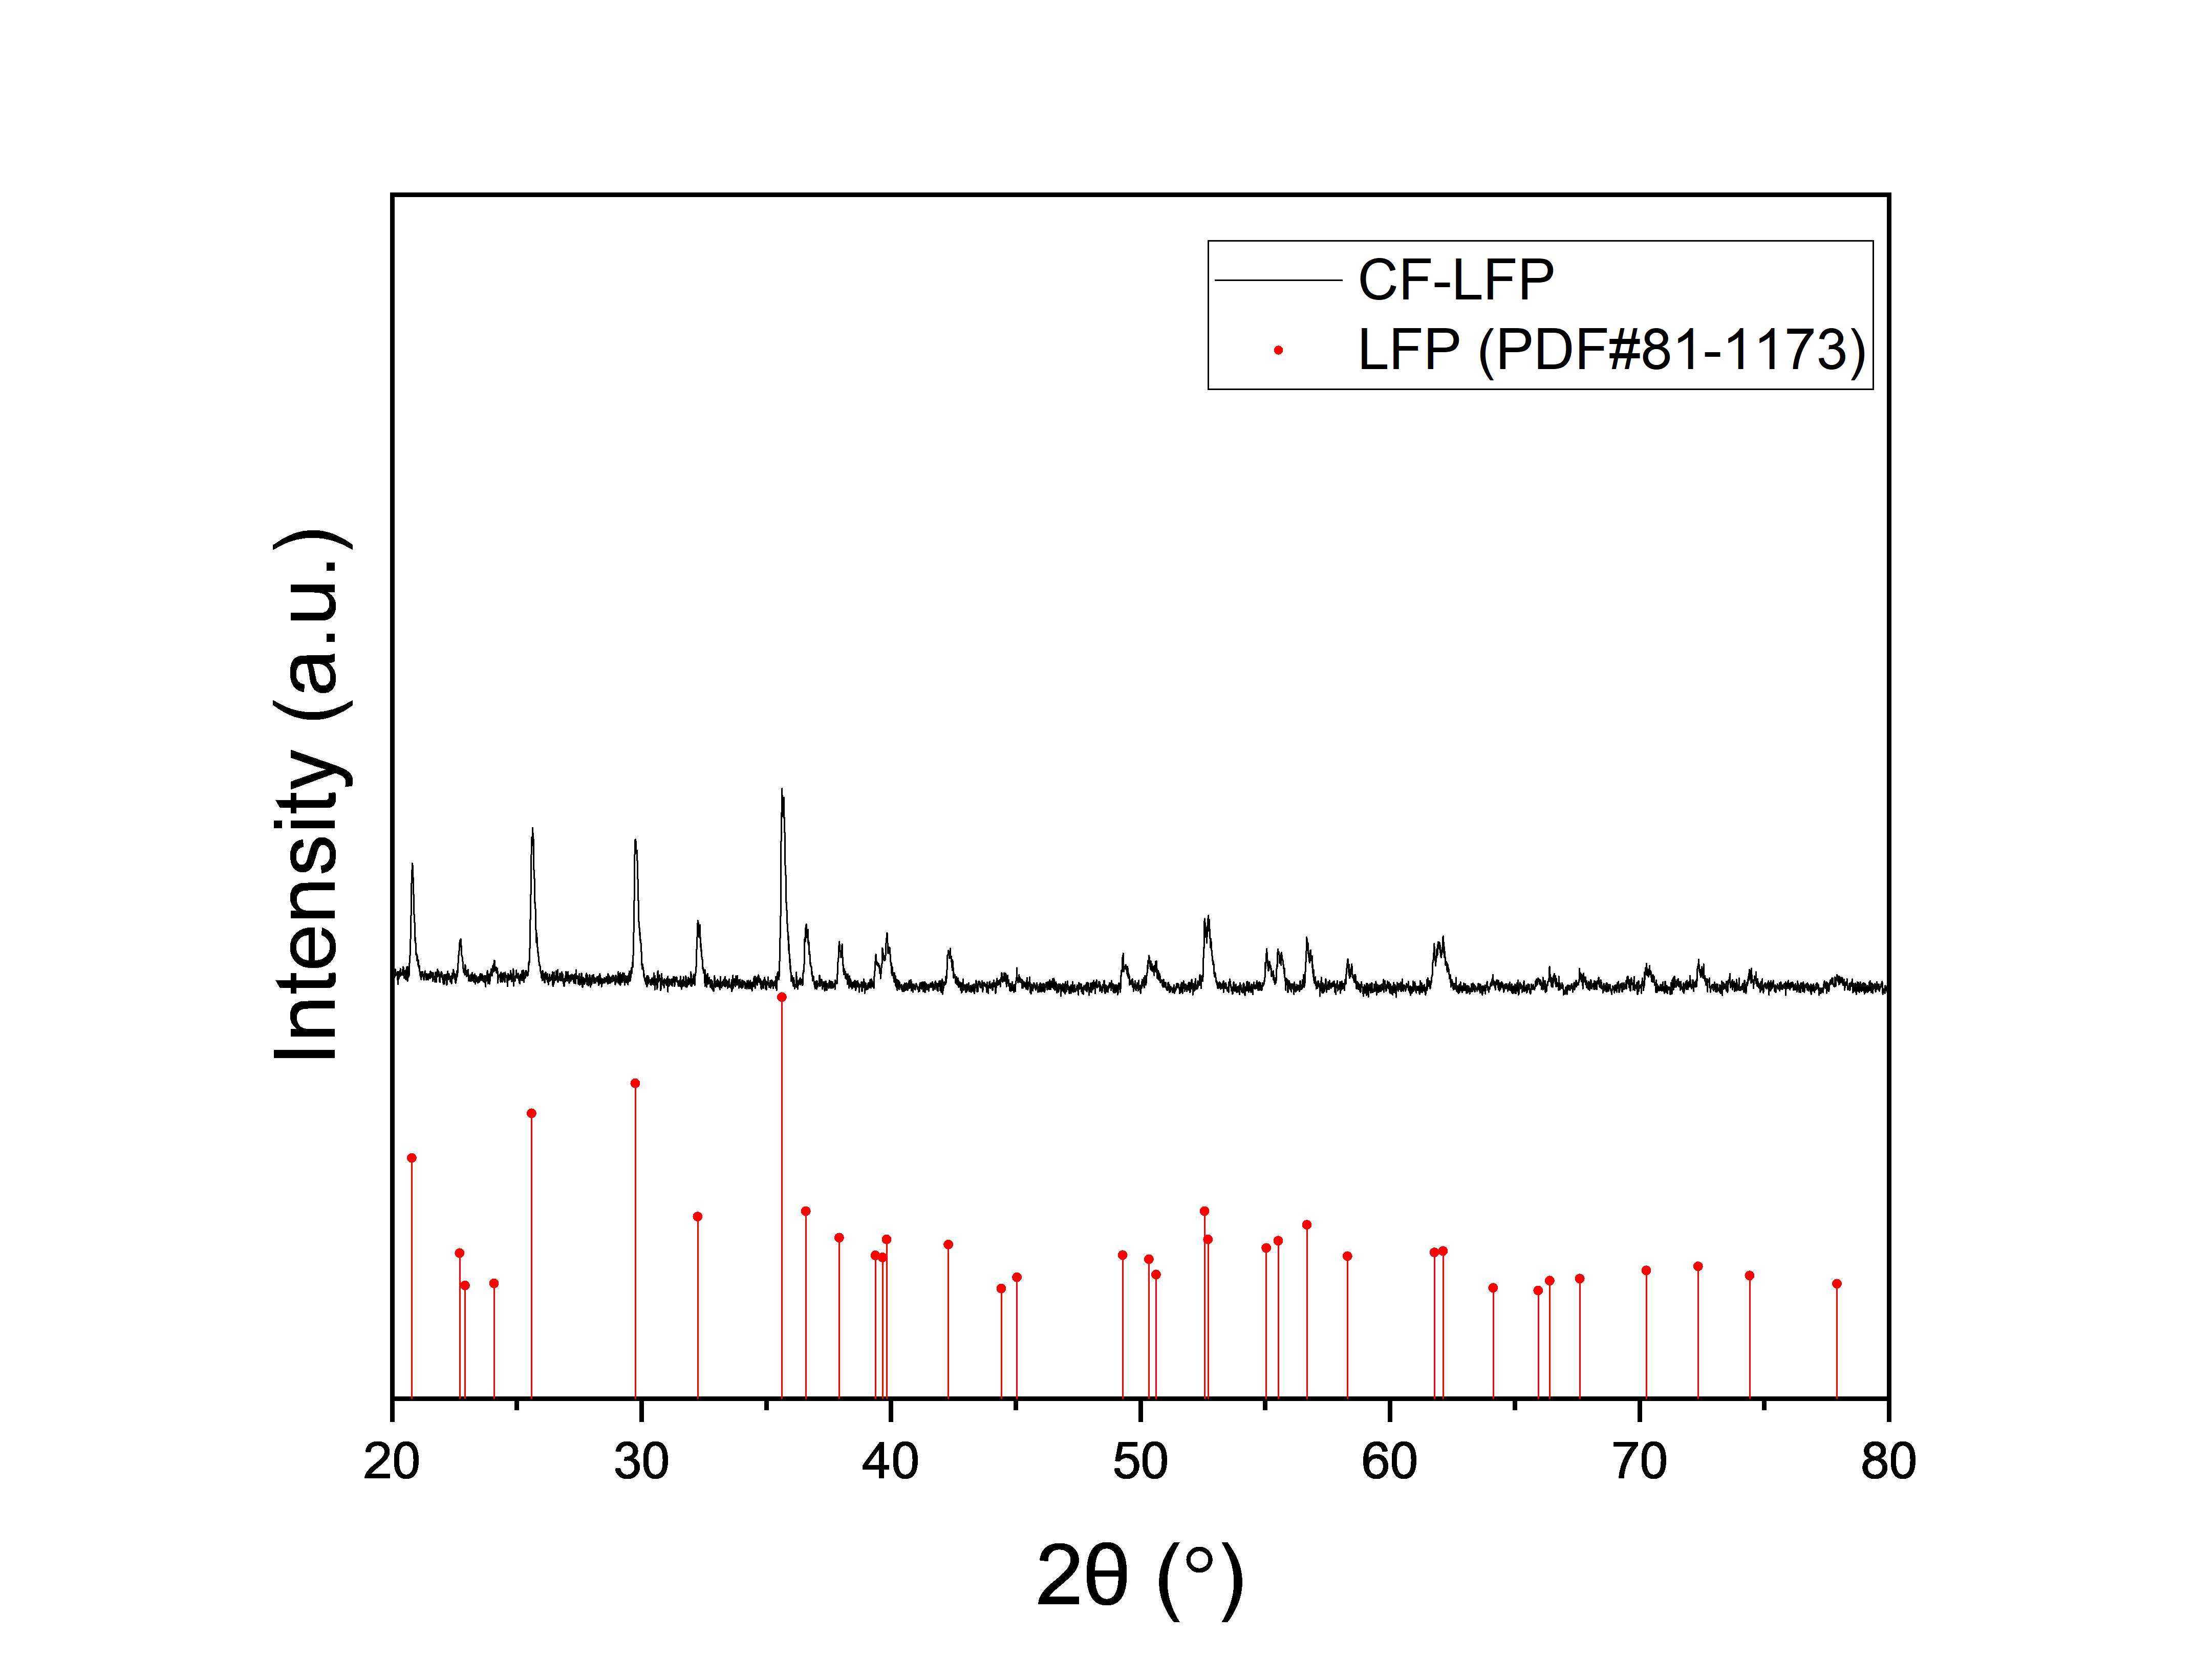
**

**Supplementary Figure 1.** XRD pattern of the CF-LFP cathode with 7:2:1 wt.% of LFP:CB:PVDF, indexed to LFP (PDF#81-1173). No peak shifts observed confirms that no reaction occurs with LFP and CF architecture after electrode fabrication.


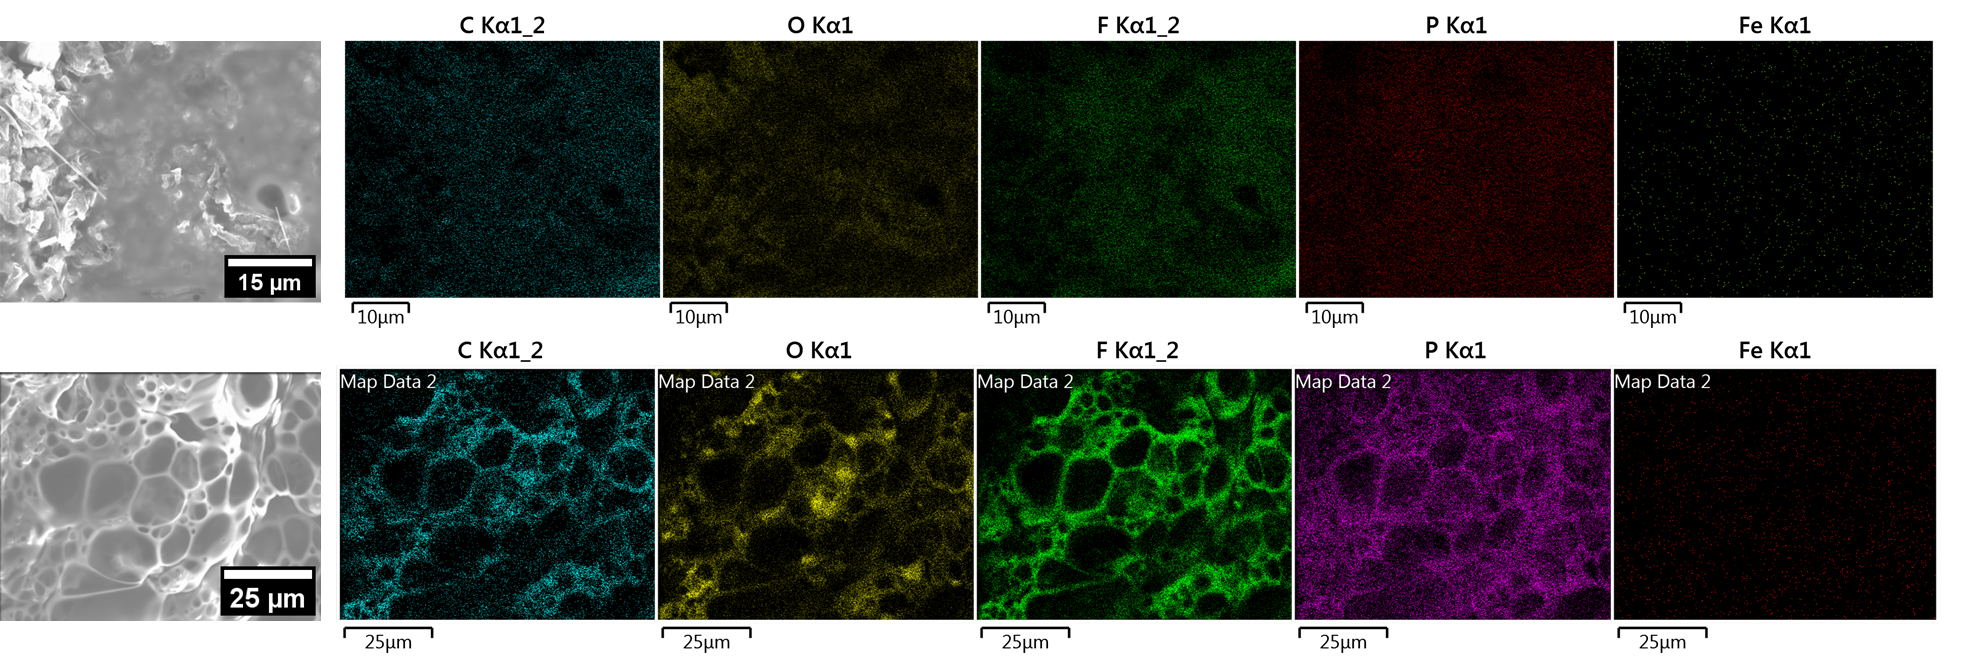


**Supplementary Figure 2.** EDS elemental mapping (C, O, F, P, Fe) of the CF-LFP and slurry cast cathodes. EDS elemental mapping shows no Fe deposited on the Li-metal anode for both (top) CF-LFP and (bottom) slurry cast half-cells.

**
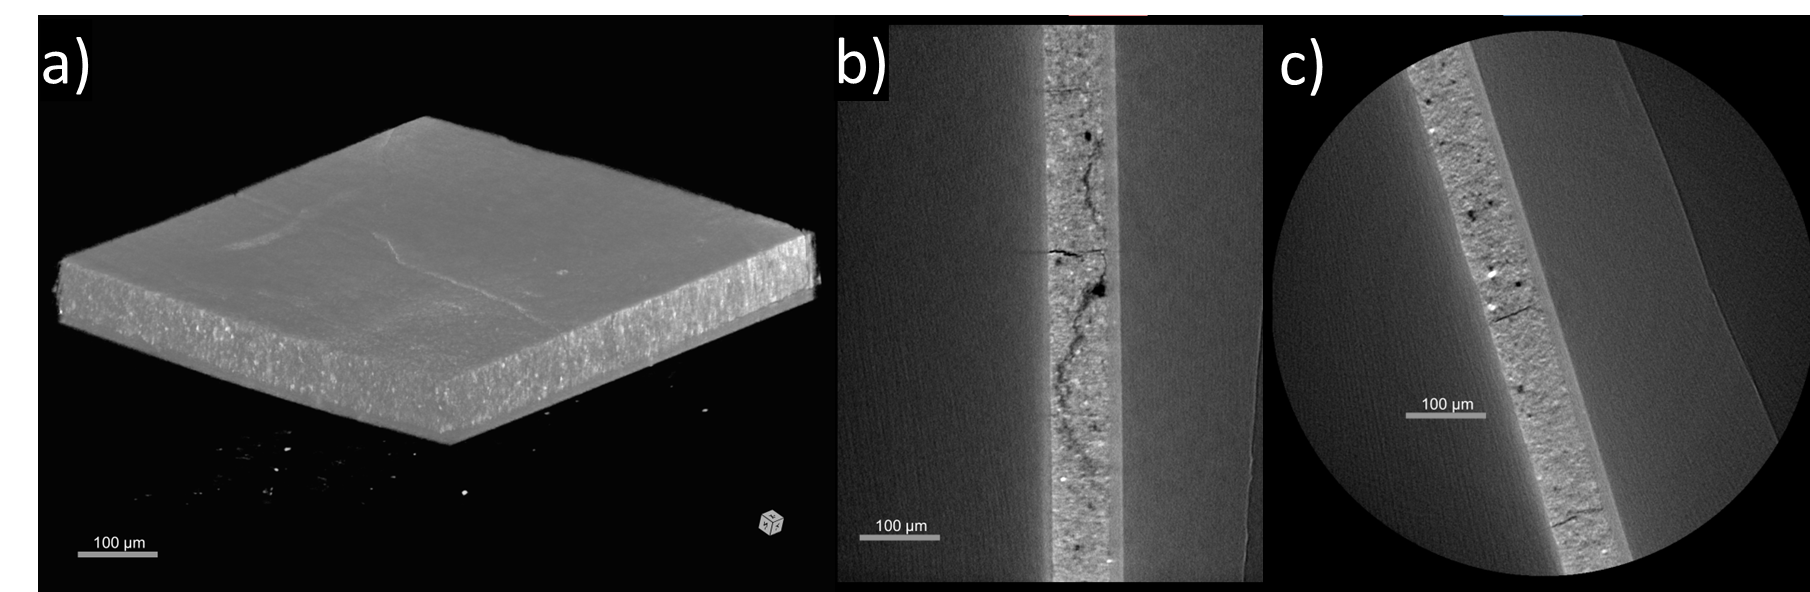
**

**Supplementary Figure 3.** XRCT scans of the cycled slurry cast LFP cathode. The a) 3D reconstructed image and b,c) two representative slices within the bulk shows major cracking within the thick slurry cast electrode.

**
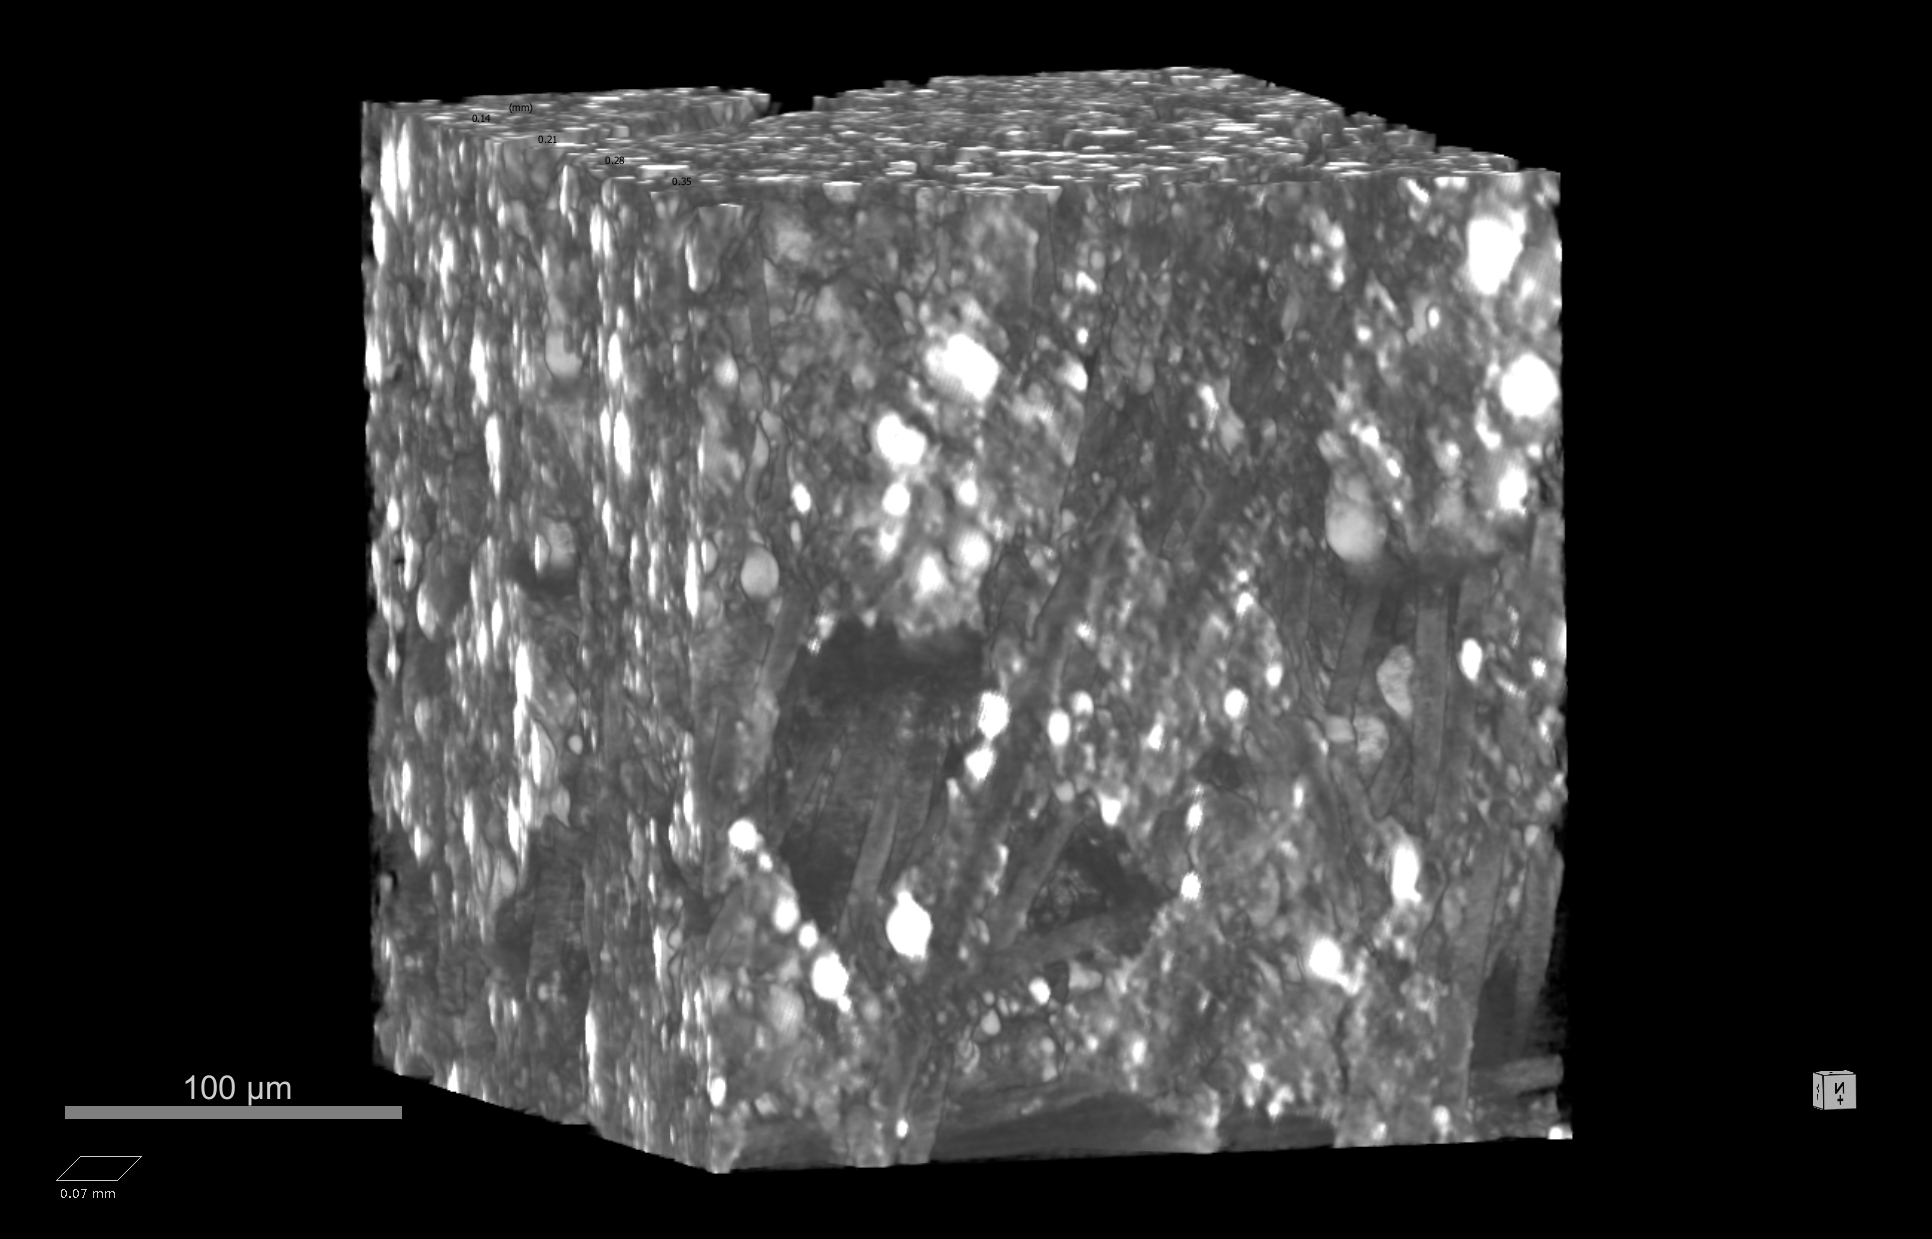
**

**Supplementary Figure 4.** XRCT scan of the cycled CF-LFP cathode. No major cracking is observed and looks similar to the pristine CF-LFP cathode from Figure 4 in the main text.

**
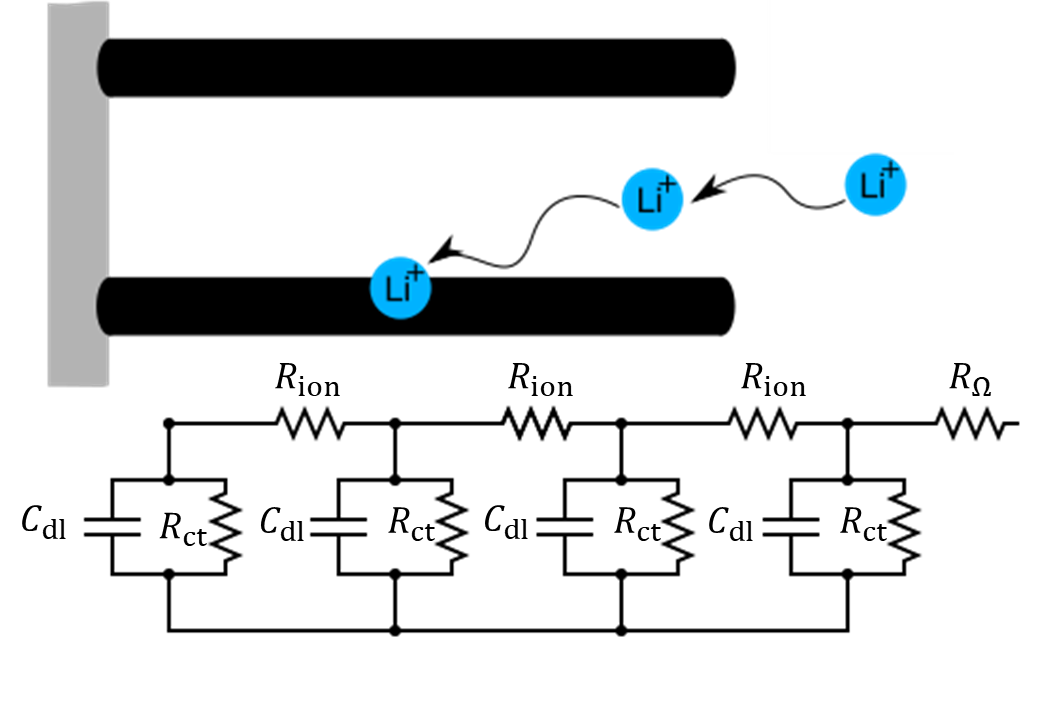
**

**Supplementary Figure 5.** Equivalent circuit of the transmission line model. In the CF-LFP cathode, is the bulk resistance of the electrolyte, is the resistance of ion mobility in the pores, and is the charge transfer resistance.


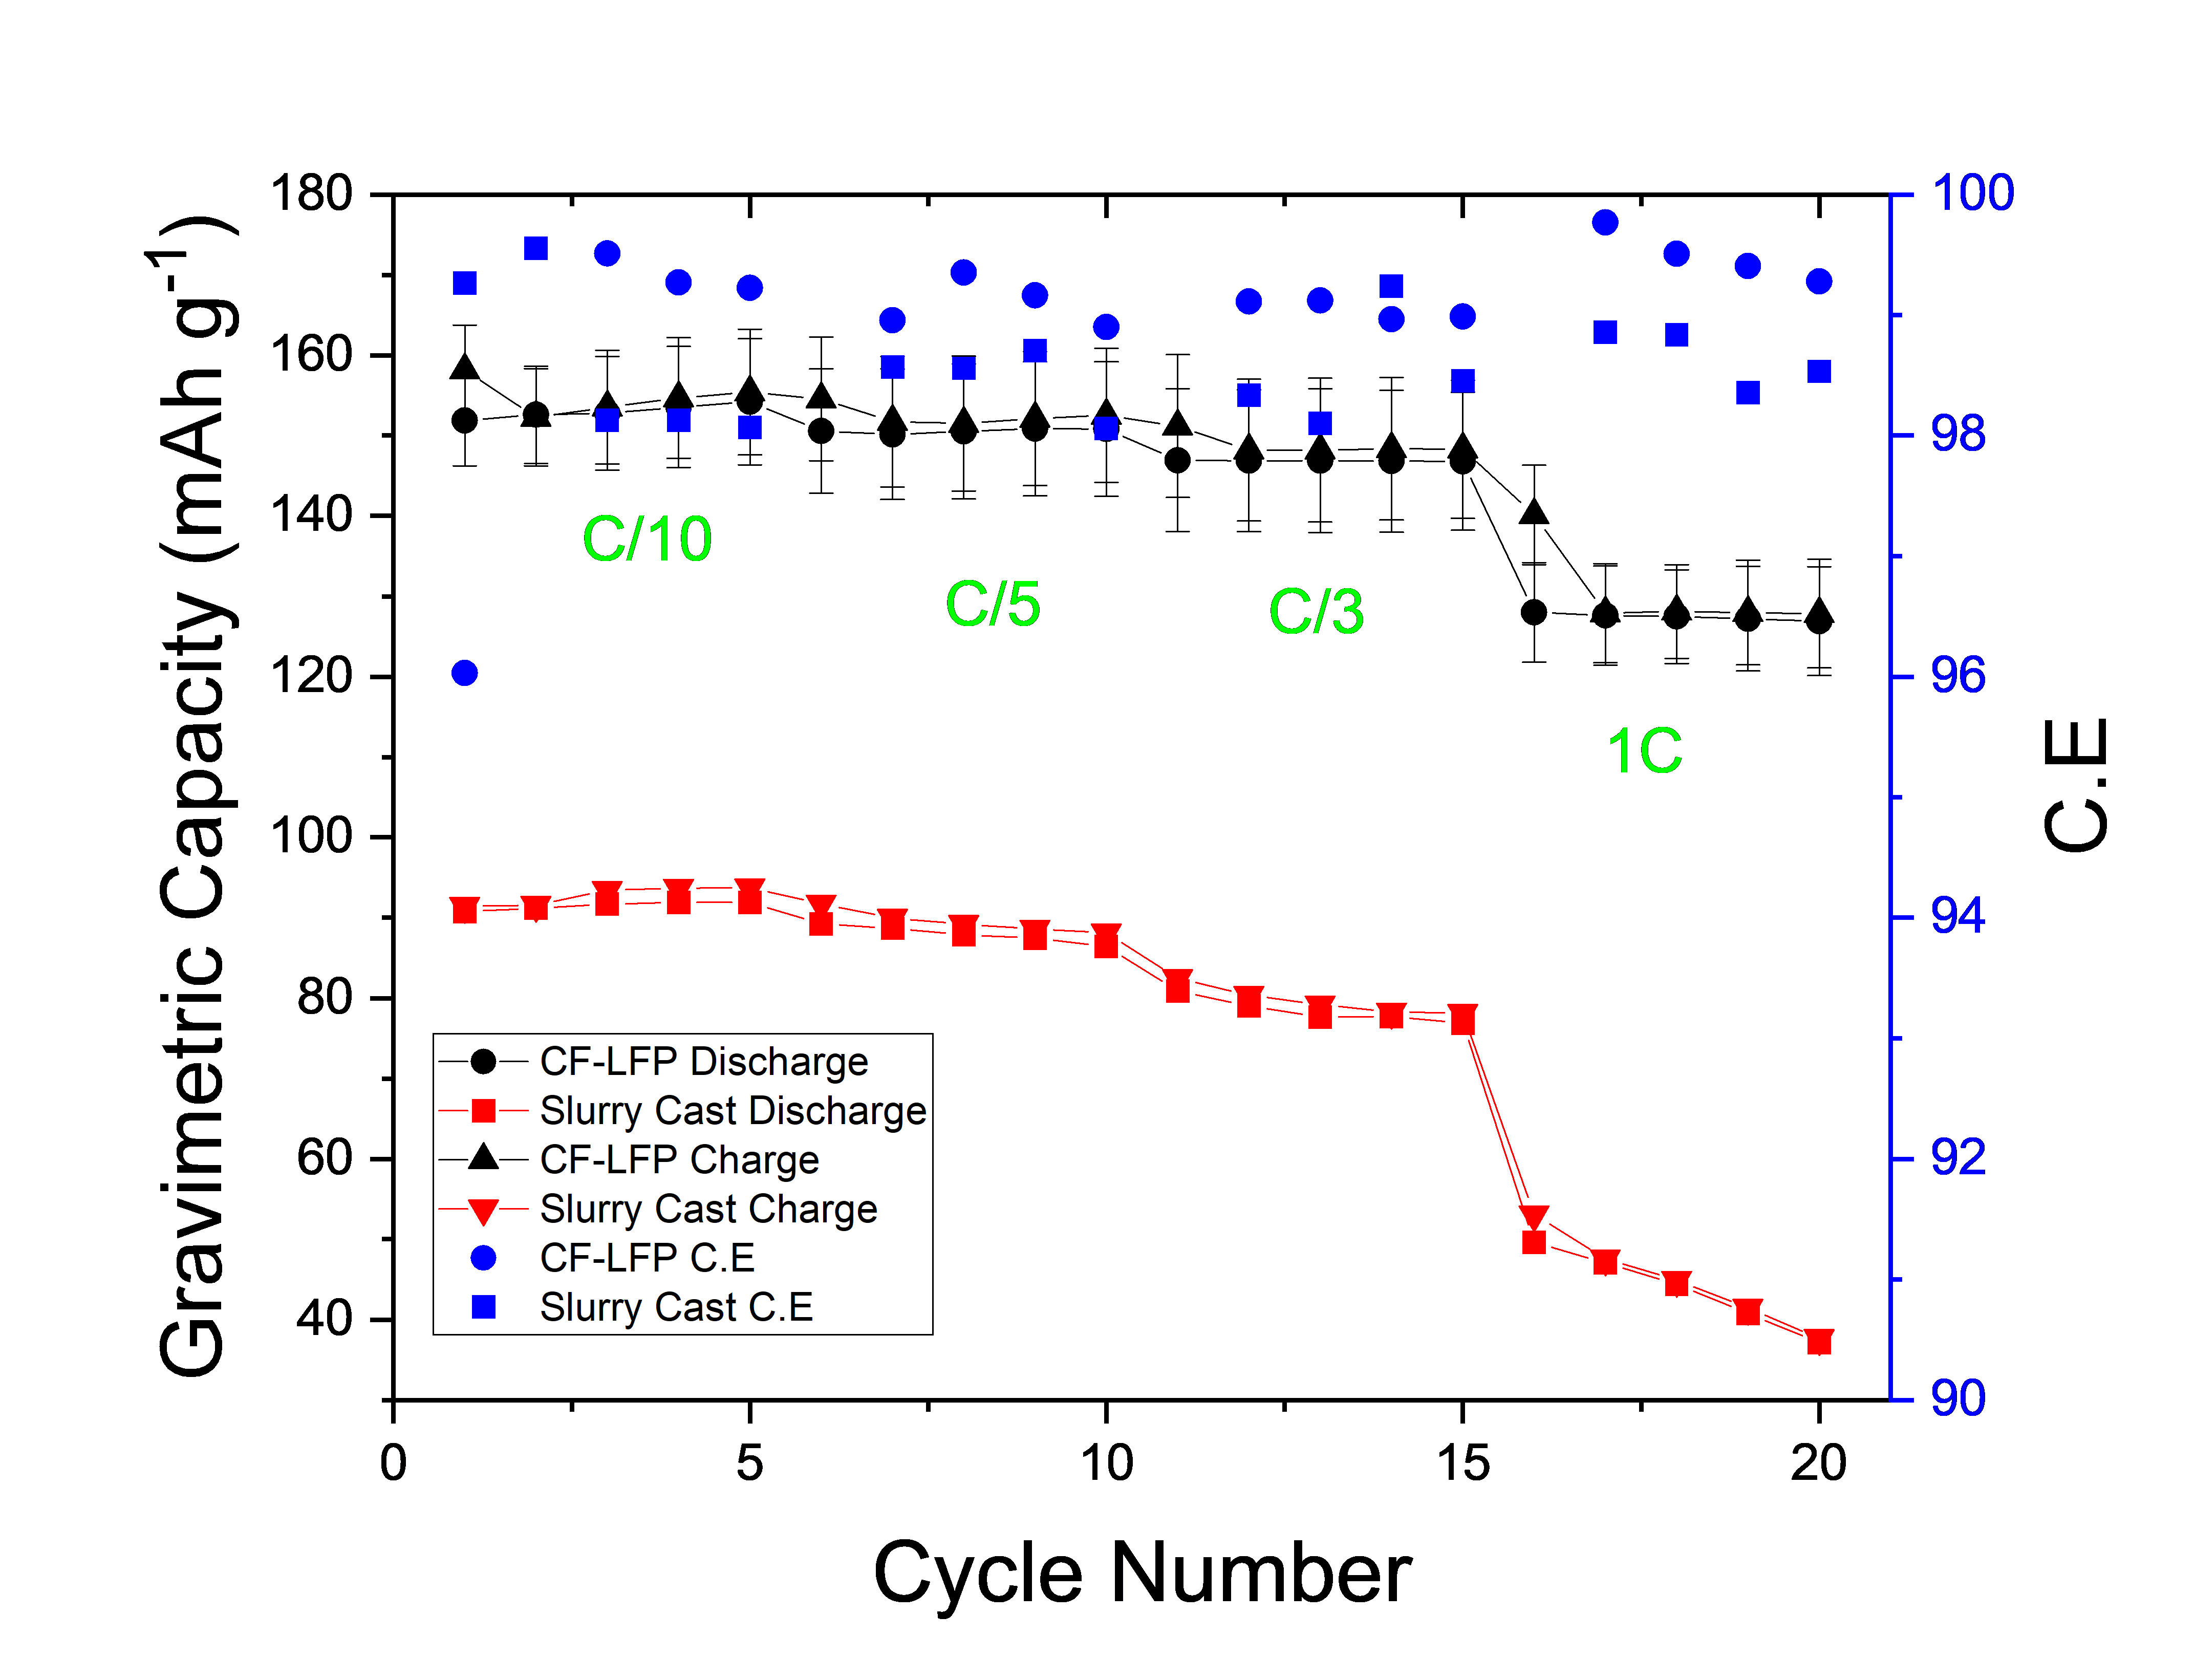


**Supplementary Figure 6.** Gravimetric capacity rate capability performance of the CF-LFP and slurry cast cathodes in a half cell configuration.

**
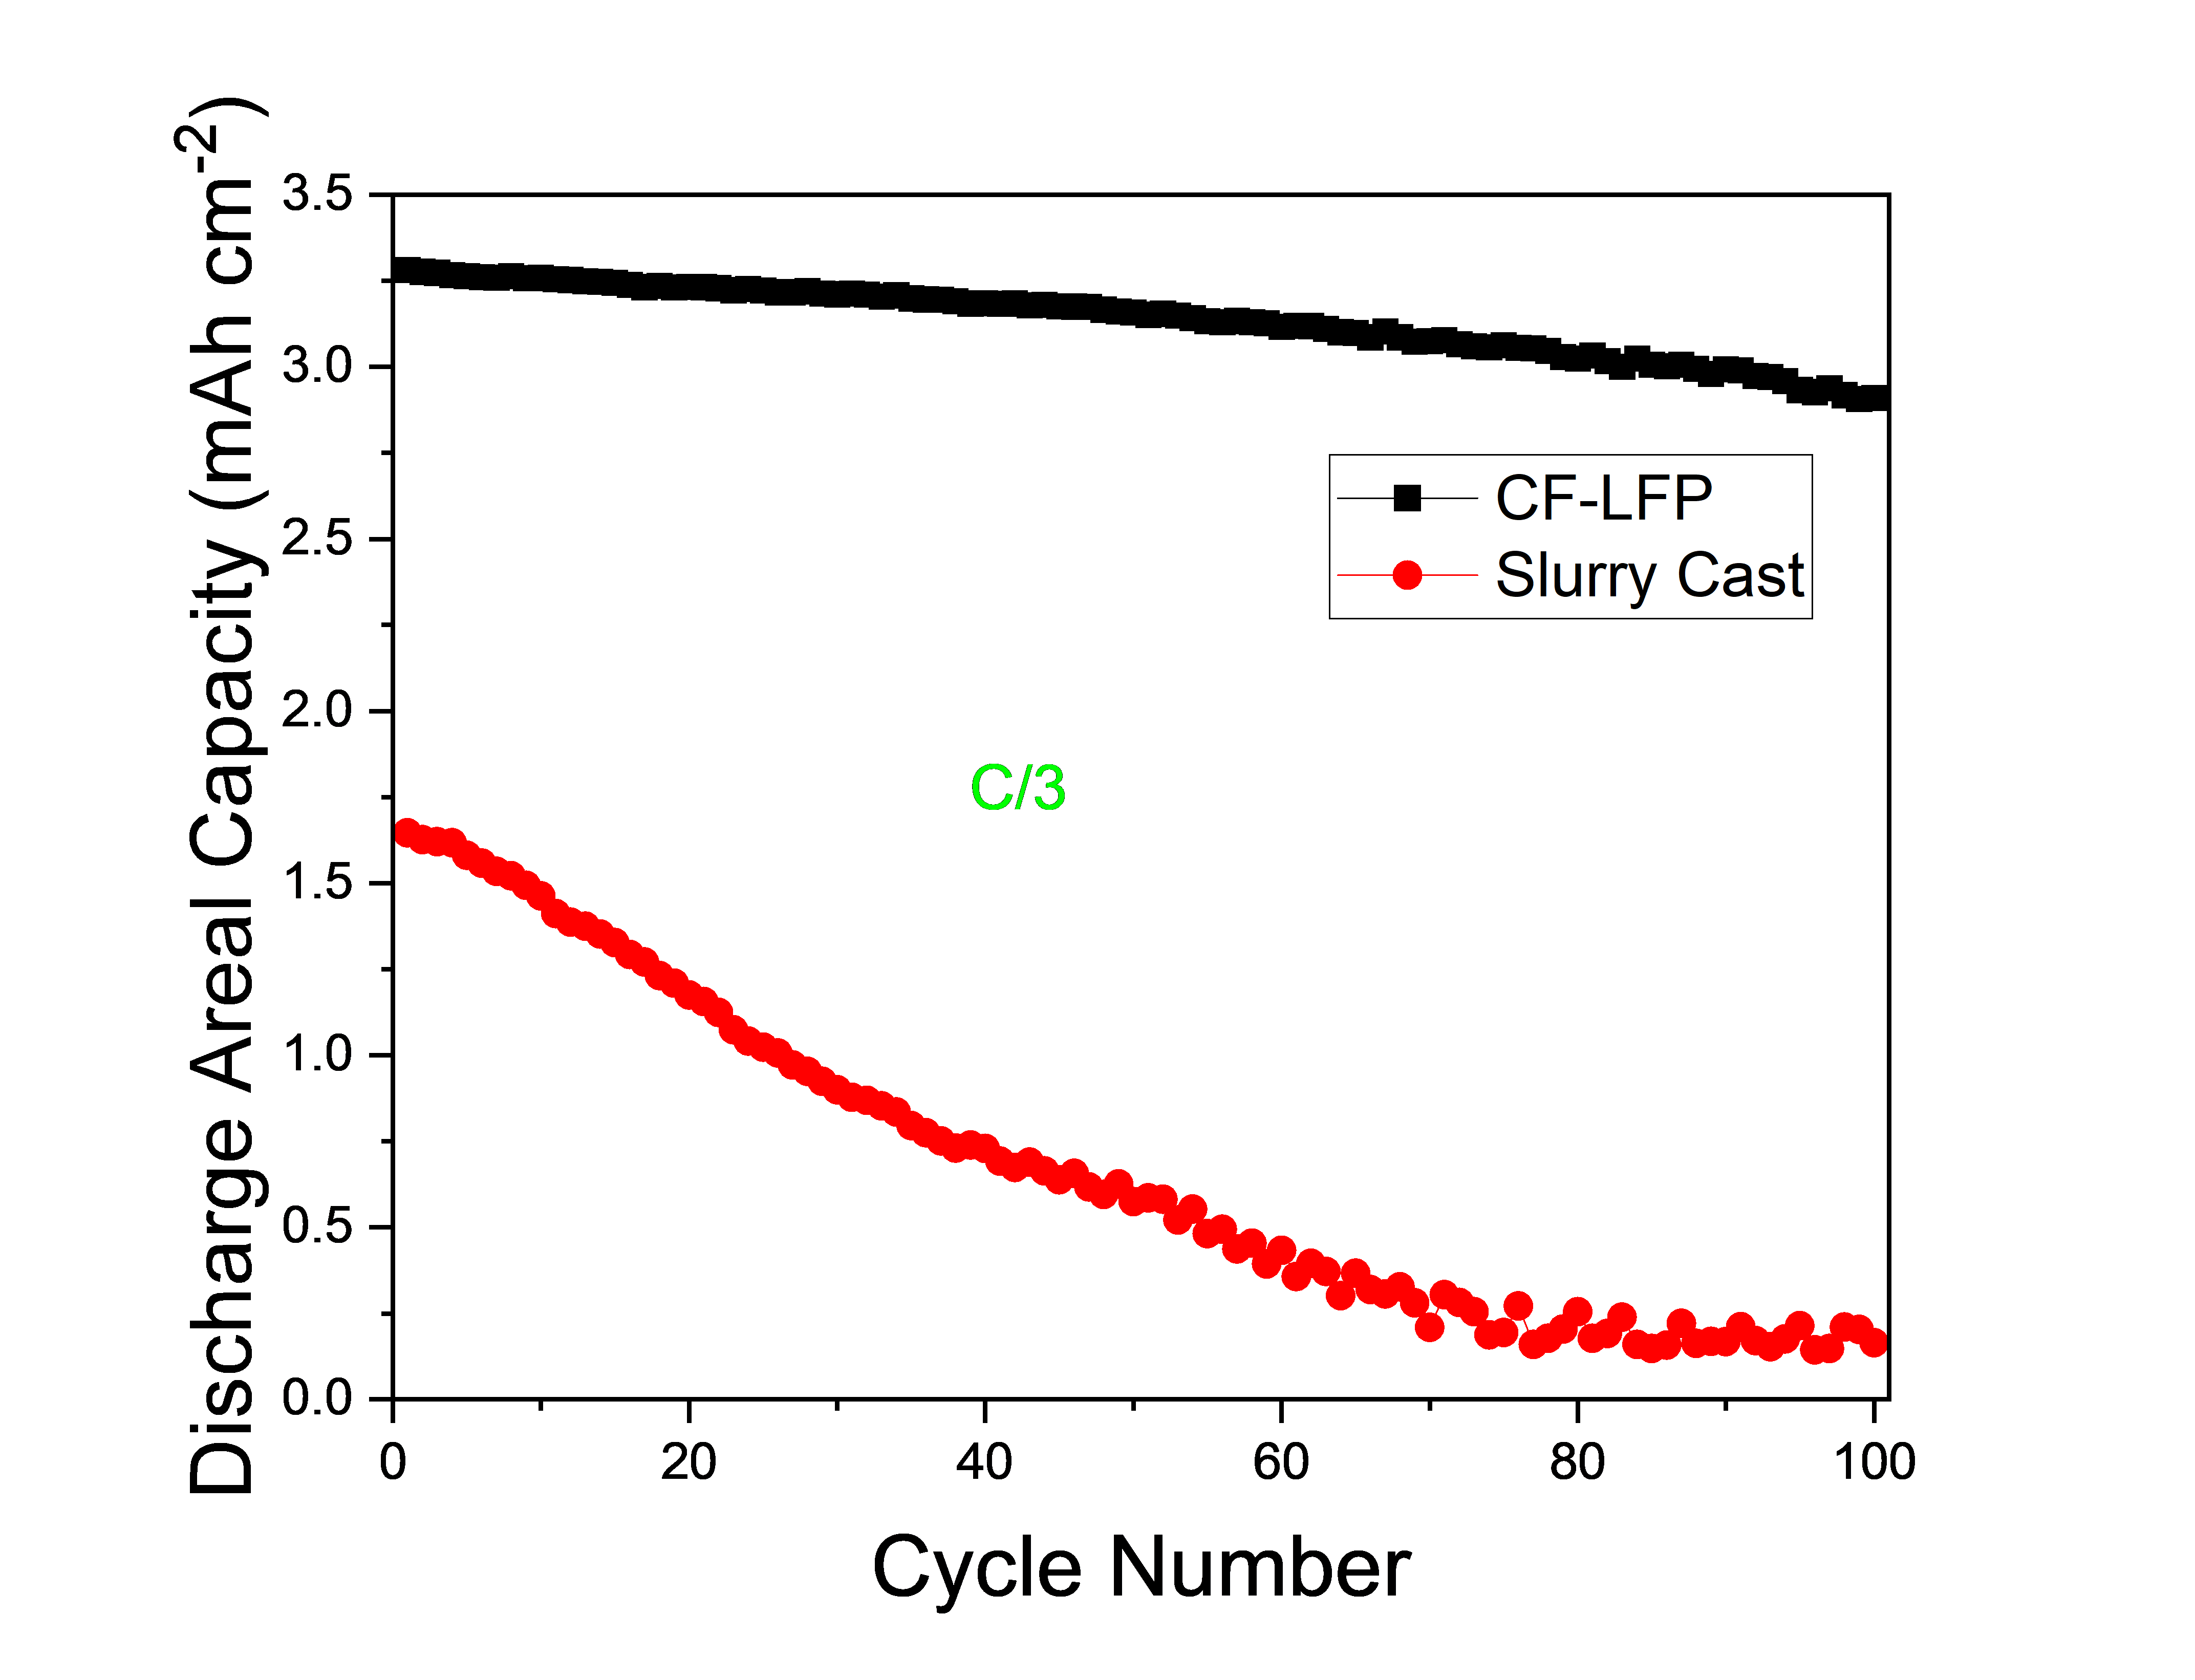
**

**Supplementary Figure 7.** Areal capacitycycling performance of the CF-LFP and slurry cast cathodes in a half cell configuration for 100 cycles at a current density of C/3.


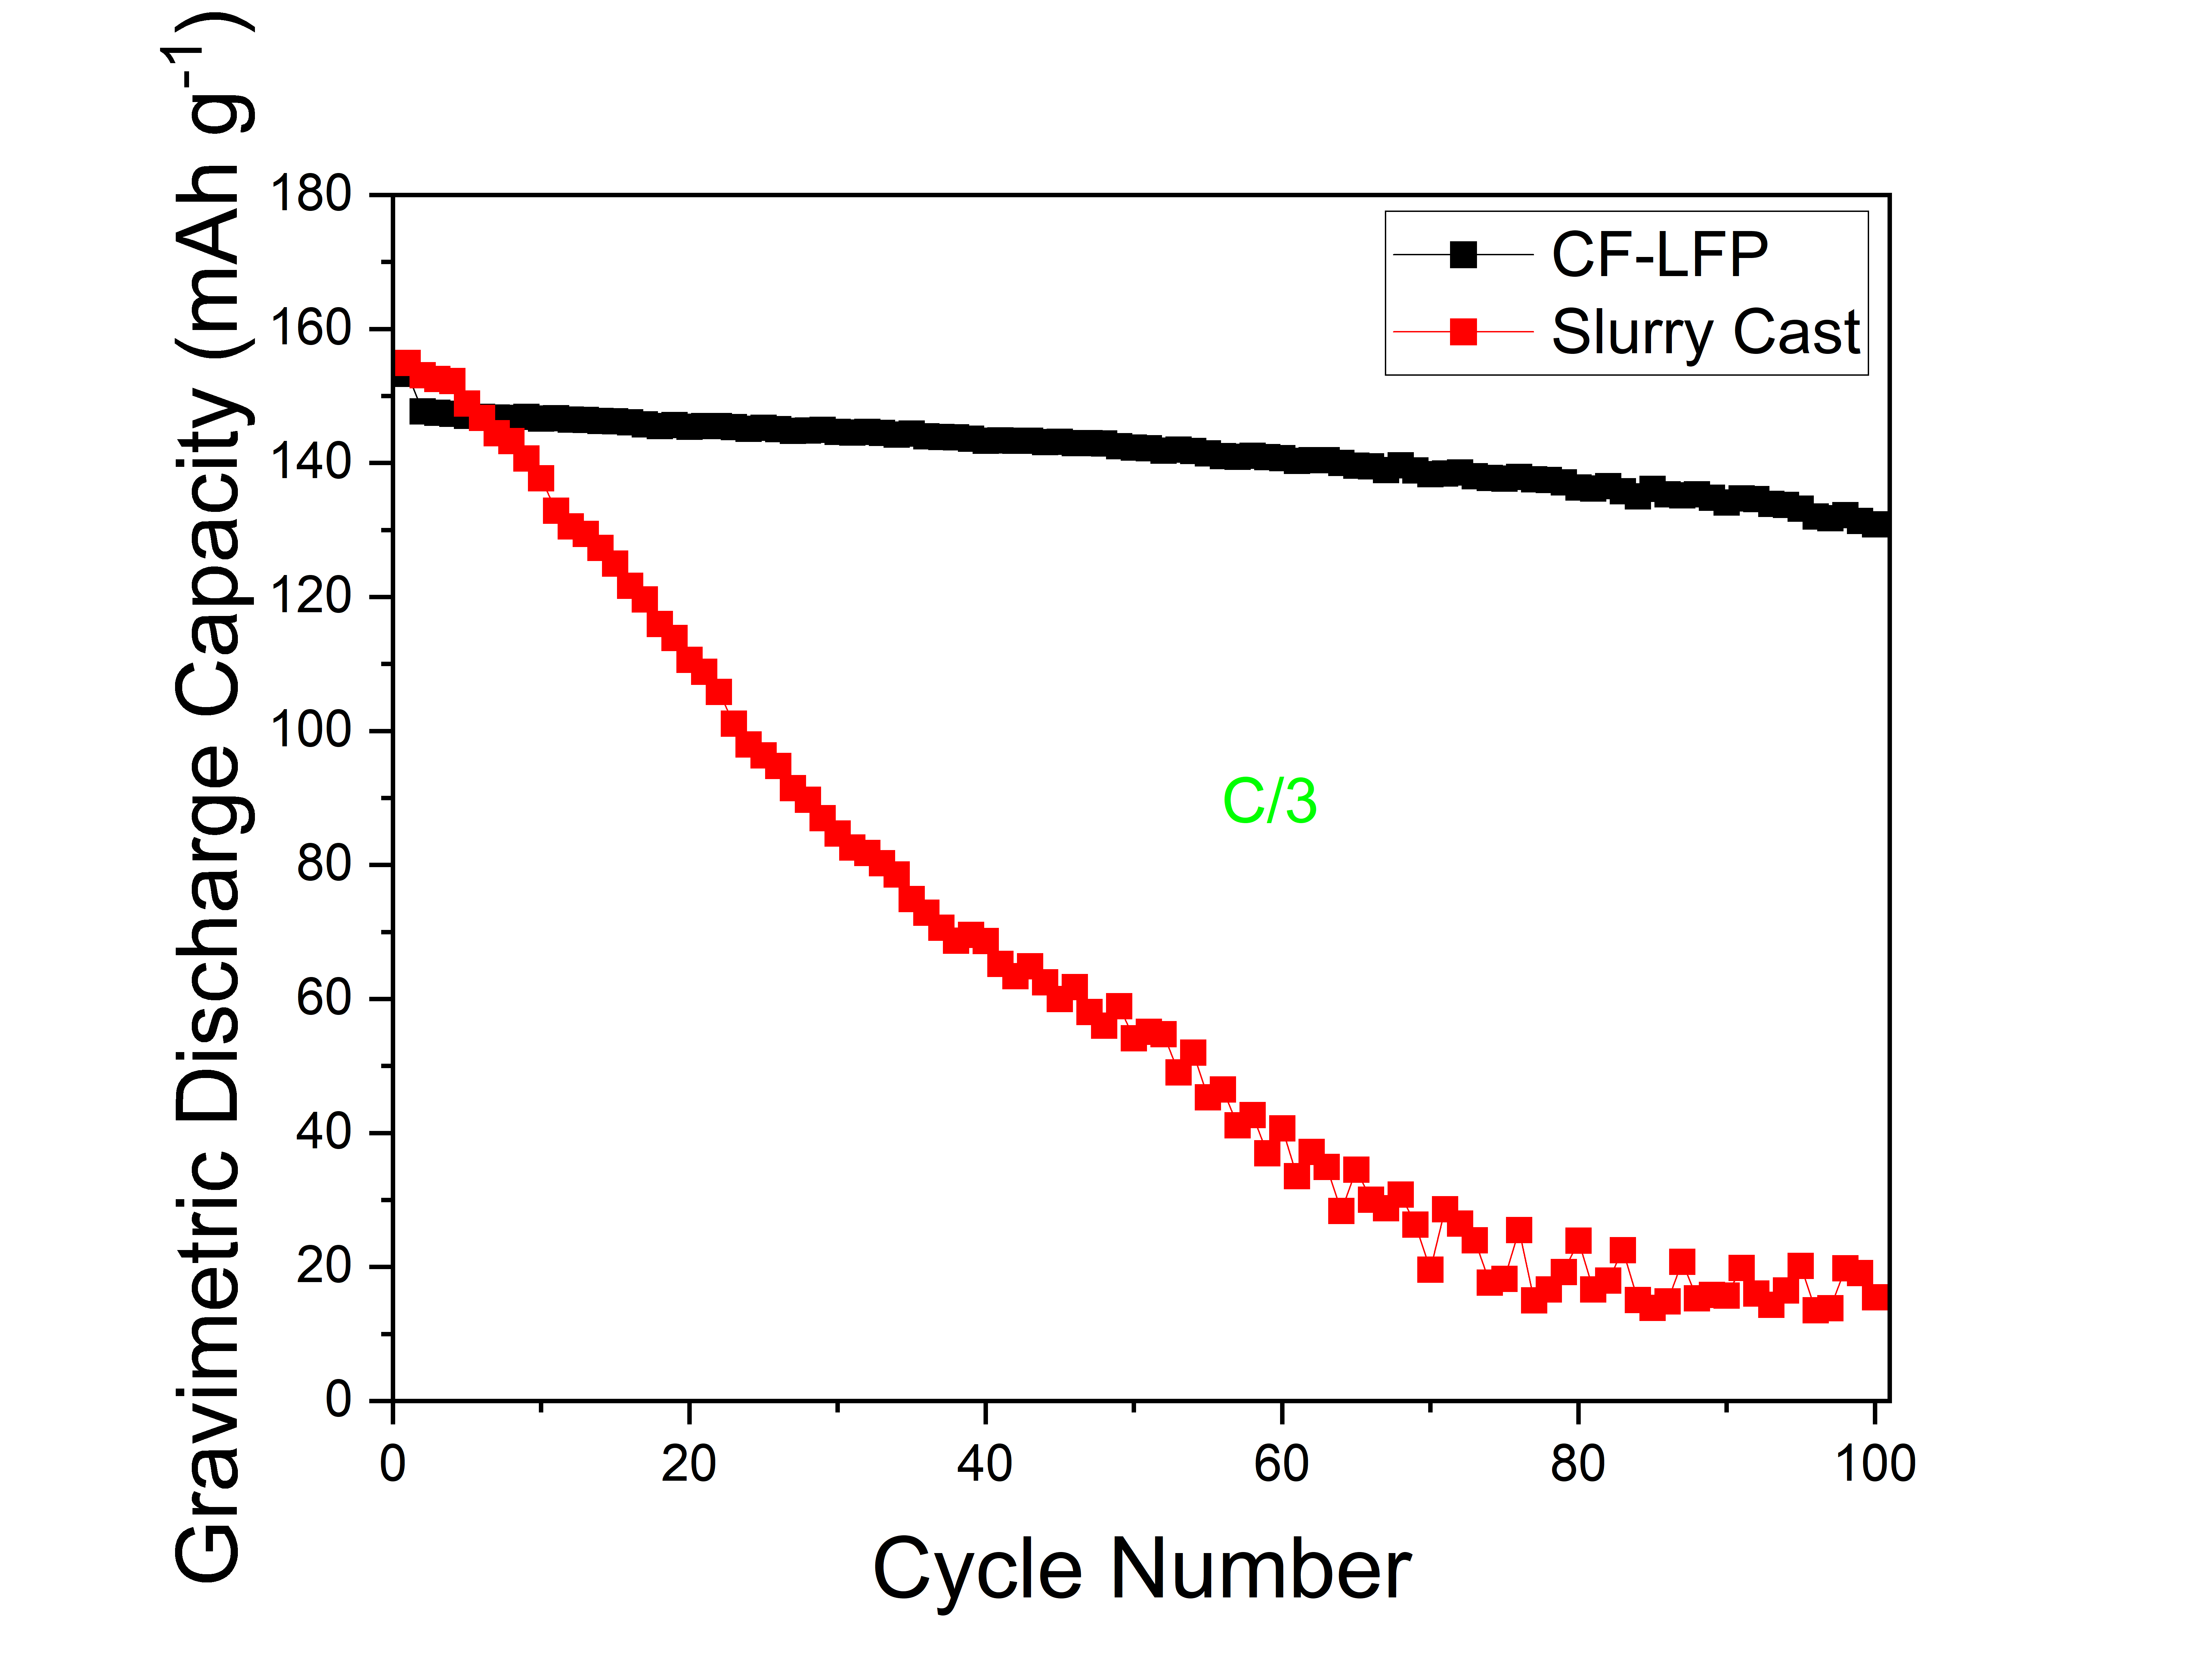


**Supplementary Figure 8.** Gravimetric capacity cycling performance of the CF-LFP and slurry cast cathodes in a half cell configuration.

TABLE I. Thick Electrode State of Art

| Cathode | Anode | Architecture | Mass Loading (mg cm-2) | Thickness (μm) | C-rate | Areal Discharge Capacity at Corresponding C-rate (mAh cm-2) |
| --- | --- | --- | --- | --- | --- | --- |
| LiFePO4 | Graphite | Slurry Cast | 13 | 100 | C/2 | 11 |
| LiFePO4 | Graphite | Laser Ablation | 12 | 85 | C/2 | 11 |
| NCM111 | Li-metal | Slurry Cast | 24 | 132 | 1C | 3.52 |
| LiFePO4 | Graphite | Slurry Cast | 16 | 136 | 1C | 2.42 |
| LiFePO4 | Li-metal | Carbonized Wood | 60 | 800 | 2/3C | 1.73 |
| LiFePO4 | Li-metal | Aligned CF | 128 | 1000 | 1C | 0.14 |
| NCM622 | Graphite | Slurry Cast | 19 | 97 | C/3 | 35 |
| LiFePO4 | Li-metal | Aligned CF-PCC (this work) | 22 | 500 | C/3 | 3.0 |
| LiFePO4 | Li-metal | Aligned CF-PCC (this work) | 22 | 500 | 1C | 2.6 |

1. Mangang, M., Seifert, H. J. & Pfleging, W. Influence of laser pulse duration on the electrochemical performance of laser structured LiFePO4 composite electrodes. *Journal of Power Sources* **304**, 24–32 (2016).

2. Zheng, H., Li, J., Song, X., Liu, G. & Battaglia, V. S. A comprehensive understanding of electrode thickness effects on the electrochemical performances of Li-ion battery cathodes. *Electrochimica Acta* **71**, 258–265 (2012).

3. Chen, C. *et al.* Highly Conductive, Lightweight, Low-Tortuosity Carbon Frameworks as Ultrathick 3D Current Collectors. *Advanced Energy Materials* **7**, 1700595 (2017).

4. Shi, B. *et al.* Low Tortuous, Highly Conductive, and High-Areal-Capacity Battery Electrodes Enabled by Through-thickness Aligned Carbon Fiber Framework. *Nano Lett.* **20**, 5504–5512 (2020).

5. Gallagher, K. G. *et al.* Optimizing Areal Capacities through Understanding the Limitations of Lithium-Ion Electrodes. *J. Electrochem. Soc.* **163**, A138 (2015).
